# Supplementary material
Source: publisher figshare collection journal article supplement (https://karger.figshare.com/ndownloader/files/6924437)
Supplement: Supplementary file 1 [file 6924437]

Supplementary table 1: Dame’s food consumption and body weight two weeks before mating until the last week of pregnancy. Body fat measured at day 17th of pregnancy.

Supplementary table 2: Gene-array and qPCR data of ALA and SFA pup’s livers, previously compared to RD. Data are means ± St.Dev.
